# Supplementary material for: An ortholog of Plasmodium falciparum chloroquine resistance transporter (PfCRT) plays a key role in maintaining the integrity of the endolysosomal system in Toxoplasma gondii to facilitate host invasion
Source: PLoS Pathog. 2019 Jun 6;15(6):e1007775. doi: 10.1371/journal.ppat.1007775 (PMC6553793; doi:10.1371/journal.ppat.1007775)
Supplement: S2 Table — (XLSX) [file ppat.1007775.s015.xlsx]

## Sheet: Sheet1
S2 Table. Primers used in the study
Name		Sequence	Comments
CUP 386	TgCRT.RTPCR.F	ACGTCGACAGGGAACACC	forward qPCR primer for TGGT1_313930 TgCRT, and P1 primer used in S1A Fig
CUP 387	TgCRT.RTPCR.R	CCATGACGGCGAAGTTGC	reverse qPCR primer for TGGT1_313930 TgCRT, and P2 primer used in S1A Fig
CUP 331	TgASP1.RTPCR.F	TCTGCGCATGCAGGAAGG	forward qPCR primer for TGGT1_201840 TgASP1
CUP 332	TgASP1.RTPCR.R	ACGACCCGAACCTTCTGG	reverse qPCR primer for TGGT1_201840 TgASP1
CUP 339	TgCPL.RTPCR.F	GAAGTCGCACCACCTTGG	forward qPCR for TGGT1_321530 TgCPL
CUP 340	TgCPL.RTPCR.R	AGAACGCCCAGCAAGAGC	reverse qPCR for TGGT1_321530 TgCPL
CUP 337	TgCPB.RTPCR.F	TGGCGTGGAGATGGTTCG	forward qPCR for TGGT1_249670 TgCPB
CUP 338	TgCPB.RTPCR.R	TTCGAGGTACGAGGGTCG	reverse qPCR for TGGT1_249670 TgCPB
CUP 574	TgSUB1.RTPCR.F	CCTCGCCTATACAGGAAG	forward qPCR for TGGT1_204050 TgSUB1
CUP 575	TgSUB1.RTPCR.R	GCAACTGTGATCAGCCCGTC	reverse qPCR for TGGT1_204050 TgSUB1
CUP 461	254010.RTPCR.F	GAGGGACCTCTGTCTTCC	forward qPCR for TGGT1_254010 TgSCP
CUP 462	254010.RTPCR.R	GAAGGCAGCCAGATCACC	reverse qPCR for TGGT1_254010 TgSCP
CUP 441	221310.RTPCR.F	CTTTAACGCTGGCGCCATGG	forward qPCR for TGGT1_221310 TgAMN
CUP 442	221310.RTPCR.R	TCTTCCACTCTCGCCACACC	reverse qPCR for TGGT1_221310 TgAMN
CUP 607	243298.RTPCR.F2	CCGCTTGCTTCTTCTCTGC	forward qPCR for TGGT1_243298 TgICEL
CUP 608	243298.RTPCR.R2	TTGCGCTCTTGGCTCTGG	reverse qPCR for TGGT1_243298 TgICEL
CUP 333	TgACT1.RTPCR.F	CCGCCGAGAAGGAAATCG	forward qPCR for TGGT1_209030 TgACT1
CUP 334	TgACT1.RTPCR.R	GAATCGCTCGTTGCCAACG	reverse qPCR for TGGT1_209030 TgACT1
CUP389	TgCRT.5UTR.FOR	GGACTTGCATCACCAACG	P3 primer used in S1A Fig
P414	Ble.INT.R	CCACTCCGCGCGCTTCAGTGG	P4 primer used in S1A Fig
P415	Ble.INT.F	ACATGGGTCAATACACAAGAC	P5 primer used in S1A Fig
CUP388	TgCRT.3UTR.REV	TTGTGTCAAGCGAGGAGG	P6 primer used in S1A Fig
CUP 73	CPB.5UTR.F	GTCTGGTTGCTTCCTTTTAC	P7 primer used in S6B Fig
P169	DHFR_R	CGCTGAGACGATGATTCCTG	P2, P8, and P14 primer used in S6 Fig
P170	DHFR_F	TTAGTCGAACCGGTTAACAC	P3, P9 and P15 primer used in S6 Fig
CUP 74	CPB.3UTR.R	GTCACCACGTTGTGCGTAG	P10 primer used in S6B Fig
CUP 113	CPB.int.F	GTGTTGCAACGCGATTC	P11 primer used in S6B Fig
CUP 114	CPB.int.R	CTTCACCCCATCTTTCC	P12 primer used in S6B Fig
P501	CRT.5TR.F.XhoI	AATTCTCGAGCGAAGCAAGGGTAGTGTTG	forward primer for cloning 5UTR of TgCRT to assemble TgCRT knockout construct
P502	CRT.5TR.R.HindIII	ATGCAAGCTTTCGCGACGGTGGAATAAG	reverse primer for cloning 5UTR of TgCRT to assemble TgCRT knockout construct
P503	CRT.3TR.F.BamHI	AATTGGATCCCTTCGATGCACGCAGTGC	forward primer for cloning 3UTR of TgCRT to assemble TgCRT knockout construct
P504	CRT.3TR.R.NotI	AATTGCGGCCGCTCTCTACGAATGCACTGTGC	reverse primer for cloning 3UTR of TgCRT to assemble TgCRT knockout construct
P370	Ku805UTR.F	GGACAGTAGCGAGCTCTGGGTTAGTTCACATTCTCACTGTAGC	forward primer for cloning 1kb of DNA region located at 6kb upstream Tgku80 gene to assemble TgCRT complementation construct to facilitate site-specific integration of complemented genes
P371	Ku805UTR.R	GTGGCAGACGACTCGATTAGCTGGTTGTTGACATAGAGTCTTCC	reverse primer for cloning 1kb of DNA region located at 6kb upstream Tgku80 gene to assemble TgCRT complementation construct to facilitate site-specific integration of complemented genes
P372	CRT5UTR.F	CCAGCTAATCGAGTCGTCTGCCACTTTCTTAGTGTACC	forward primer for cloning 5UTR of TgCRT to assemble TgCRT complementation construct
P373	CRT5UTR.R	GGTGAGCCGGCGGCATGGTGTTTGCTGGACGAGCGCTGAAGC	reverse primer for cloning 5UTR of TgCRT to assemble TgCRT complementation construct
P374	CRT.F	GCAAACACCATGCCGCCGGCTCACCACG	forward primer for cloning 3UTR of TgCRT to assemble TgCRT complementation construct
P375	CRT.R	GGAATCTTTTGCGAAGCATGACAATTGAGG	reverse primer for cloning 3UTR of TgCRT to assemble TgCRT complementation construct
CUP163	NanoLuc.EcoRI.F	TCTTGAATTCCCTTTTTCGACAAAATGGTCTTCACACTCGAAG	forward primer to clone nLuc and polyA tail under TgTub promoter to drive expression of nLuc in the parasites
CUP164	SV40.NotI.3UTR.R	AATTGCGGCCGCTTTACCACATTTGTAGAGG	reverse primer to clone nLuc and polyA tail under TgTub promoter to drive expression of nLuc in the parasites
CUP 204	HindIII.HXG.F	GGCCAAGCTTAGTGAATTCGAGCTCATG	forward primer to clone HXG gene which was used to replace BLE resistance gene in the plasmid expressing nLuc in parasites
CUP 205	BamHI.HXG.R	AATTGGATCCGCAGGTCGACTCTAGATG	reverse primer to clone HXG gene which was used to replace BLE resistance gene in the plasmid expressing nLuc in parasites
CUP 604	221310.sgRNA.F	GTTGACCGTGCGTTAGCGGCATGTTTTAGAGCTAGAAATAGC	forward primer to amplify sgRNA of TgAMN to facilitate epitope-tagging
P464	sgRNA.rev	AACTTGACATCCCCATTTACCAGAAGGCAAACACC	reverse primer to amplify sgRNA of TgAMN to facilitate epitope-tagging
CUP 605	221310.3xHA.F	ACCAGGTATCTCGAATGATCTCAAAGACGTTGTTGACCGTGCGTTAGCGGCAATTAAAATTGGAAGTGGAGGACGGG	forward primer to amplify a DNA fragment containing 3xHA and PYR resistance gene for epitope-tagging TgAMN
CUP 606	221310.3xHA.R	GGAAGAGGAGACACGCTGACAAGACTTTCATGCGCCTCCAGCTTCGTCTCGCTCTAGAACTAGTGGATCGATCC	reverse primer to amplify a DNA fragment containing 3xHA and PYR resistance gene for epitope-tagging TgAMN
P333	003290.myc.F2	TCACTATAGGGCGAATTGGGTACTCCTTGTAGGTCAGAAAATAC	forward primer to amplify a DNA fragment containing 3xmyc and PYR resistance gene for epitope-tagging TgSCP
P315	003290.myc.R	AATCAACTTTTGTTCCCTAGGAGATCCTCCTCCTCCGGATCCTCCTCCTCCGAGCTCGCTGTCCCCCCCCAC	reverse primer to amplify a DNA fragment containing 3xmyc and PYR resistance gene for epitope-tagging TgSCP
CUP60	TgCPB.sgRNA.Fwd	GCGAAAGTCTTTTCGCGTTCT GTTTTAGAGCTAGAAATAGC	forward primer to amplify sgRNA of TgCPB to delete TgCPB in ∆crt
CUP159	CPB.DHFR.F	ACAAGATTGACGGAATATCAGTCCTGCACCATCAGCTTTTTTTCACCAGTCCGCGTTCGTGAAATTCTC	forward primer to amplify a DNA fragment containing PYR resistance gene and 50bp homologous regions of 5'- and 3'-UTRs of TgCPB to create ∆crt∆cpb knockout
CUP160	CPB.DHFR.R	CACGTGCTCGAGCCGCCTCTTTCCGCAAACAGGAAGTCTTTTCGTCAATG CGCTCTAGAACTAGTGGATC	reverse primer to amplify a DNA fragment containing PYR resistance gene and 50bp homologous regions of 5'- and 3'-UTRs of TgCPB to create ∆crt∆cpb knockout
P428	ASP1.NdeI.F	ATGC CATATG CAC CAC CAC CAC CAC CACGACGACCCAAGAAACAGTCC	forward primers to clone the proform of TgASP1 and engineer a 6xHis tag at its N-terminus
P429	ASP1.HindIII.R	ATGC AAGCTT TCAGTTCTTGAGTCTGGCGAAGC	reverse primers to clone the proform of TgASP1 and engineer a 6xHis tag at its N-terminus
P377	TgCRT.TtoK.F	CGACAGGGAACAAAATTTGTTTCAAG	forward primer to mutate threonine at position 369 within TgCRT to lysine in WT TgCRT complementation construct
P378	TgCRT.TtoK.R	CTTGAAACAAATTTTGTTCCCTGTCG	reverse primer to mutate threonine at position 369 within TgCRT to lysine in WT TgCRT complementation construct
CUP345	sgRNA.TgCPL	GTCGTCCTCGCCGTTGAGGAGTTTTAGAGCTAGAAATAGC	forward primer to amplify sgRNA of TgCPL to delete TgCPL in ∆crt
CUP346	CPL.5ARM.DHFR	GAGTTTTGACCGTTTGTCCCTCTTACCCCGCGGCCTCGCTCTCGAACACCGTCCGCGTTCGTGAAATTCTC	forward primer to amplify a DNA fragment containing PYR resistance gene and 50bp homologous regions of 5'- and 3'-UTRs of TgCPL to create ∆crt∆cpl knockout
CUP347	CPL.3ARM.DHFR	CGTCTTCCTTCTCACTTCCTTCCACGAACTTCCCGAAAGCCACGGTCGCGCGCTCTAGAACTAGTGGATC	reverse primer to amplify a DNA fragment containing PYR resistance gene and 50bp homologous regions of 5'- and 3'-UTRs of TgCPL to create ∆crt∆cpl knockout
P100	pCPL comp seq 5	GCAAGCGTCATTCGCCGC	P1 primer used in S6A Fig
CUP361	TgCPL.3UTR.R	ATACAGTGGACTGACTCG	P4 primer used in S6A Fig
CUP339	TgCPL.RTPCR.F	GAAGTCGCACCACCTTGG	P5 primer used in S6A Fig
CUP362	TgCPL.CDS.R	GTCCGATACCTGTGTTCC	P6 primer used in S6A Fig
CUP 767	TgSUB1.sgRNA.F	GACGTTGAGGTGAAAGTTACAGTTTTAGAGCTAGAAATAGC	forward primer to amplify sgRNA of TgSUB1 to delete TgSUB1 in ∆crt
CUP 768	TgSUB1.DHFR.F	TGACCGCATTCGCCCGATCGAGCACGCTGAACAAGTCTGTCATCGGCACGGTCCGCGTTCGTGAAATTCTC	forward primer to amplify a DNA fragment containing PYR resistance gene and 50bp homologous regions of 5'- and 3'-UTRs of TgSUB1 to create ∆crt∆sub1 knockout
CUP 769	TgSUB1.DHFR.R	TCTGCGCAGAAATATGTTTGTGTGTTTTTCCAGCTACGTTGAGGTGAAAGCGCTCTAGAACTAGTGGATC	reverse primer to amplify a DNA fragment containing PYR resistance gene and 50bp homologous regions of 5'- and 3'-UTRs of TgSUB1 to create ∆crt∆sub1 knockout
CUP 770	TgSUB1.Int.F	GTGCTAAAAGCGTGTCAC	P13 primer used in S6C Fig
CUP 771	TgSUB1.Int.R	TACGTACCGGGAAGAATG	P16 primer used in S6C Fig
CUP574	TgSUB1.RTPCR.F	CCTCGCCTATACAGGAAG	P17 primer used in S6C Fig
CUP575	TgSUB1.RTPCR.R	GCAACTGTGATCAGCCCGTC	P18 primer used in S6C Fig
CUP316	Tubpro_phuorin2.F	ACTAAAGGGAACAAAAGCTGAAAACGAAGAAAAACGCTGTTTGC	forward primer to amplify pHLuorin2 and assemble it under a Toxoplasma tubulin promoter for its cytoplasmic expression
CUP317	Tubpro_phuorin2.R	AGCTCCTCGCCCTTGCTCATTTTGTCGAAAAAGGGAATTCAAGAAAAAATGCCAACGAGTAGTTTTCC	reverse primer to amplify pHLuorin2 and assemble it under a Toxoplasma tubulin promoter for its cytoplasmic expression
CUP318	phluorin2 BB.F	GAATTCCCTTTTTCGACAAAATGAGCAAGGGCGAGGAGCTG	forward primer to amplify the plasmid backbone for generation of pTub-pHluorin2 via Gibson assembly
CUP319	phluorin2 BB.R	ACAGCGTTTTTCTTCGTTTTCAGCTTTTGTTCCCTTTAGTGAGGG	reverse primer to amplify the plasmid backbone for generation of pTub-pHluorin2 via Gibson assembly
